# Supplementary material for: Screening a Strain of Aspergillus niger and Optimization of Fermentation Conditions for Degradation of Aflatoxin B1
Source: Toxins (Basel). 2014 Nov 13;6(11):3157–72. doi: 10.3390/toxins6113157 (PMC4247255; doi:10.3390/toxins6113157)

## Supplementary Information

**Table S1.** Results and analysis of L<sub>16</sub> (4<sup>3</sup>) orthogonal test of aflatoxin B<sub>1</sub> degradation by ND-1.

| Run | A     | B     | C     | Aflatoxin B <sub>1</sub> Degradation (%) |
|-----|-------|-------|-------|------------------------------------------|
| 1   | 1     | 1     | 1     | 18.0                                     |
| 2   | 2     | 2     | 1     | 24.5                                     |
| 3   | 3     | 3     | 1     | 33.3                                     |
| 4   | 4     | 4     | 1     | 22.4                                     |
| 5   | 1     | 2     | 2     | 38.2                                     |
| 6   | 2     | 1     | 2     | 38.9                                     |
| 7   | 3     | 4     | 2     | 38.1                                     |
| 8   | 4     | 3     | 2     | 21.0                                     |
| 9   | 1     | 3     | 3     | 26.4                                     |
| 10  | 2     | 4     | 3     | 48.6                                     |
| 11  | 3     | 1     | 3     | 22.0                                     |
| 12  | 4     | 2     | 3     | 14.3                                     |
| 13  | 1     | 4     | 4     | 29.0                                     |
| 14  | 2     | 3     | 4     | 29.6                                     |
| 15  | 3     | 2     | 4     | 26.6                                     |
| 16  | 4     | 1     | 4     | 12.3                                     |
| K1  | 111.5 | 101.2 | 98.3  | -                                        |
| K2  | 141.5 | 103.6 | 126.1 | -                                        |
| K3  | 120.0 | 110.3 | 121.3 | -                                        |
| K4  | 70.1  | 128.0 | 97.5  | -                                        |
| k1  | 27.9  | 25.3  | 24.6  | -                                        |
| k2  | 35.4  | 25.9  | 31.5  | -                                        |
| k3  | 30.0  | 27.6  | 30.3  | -                                        |
| k4  | 17.5  | 32.0  | 24.4  | -                                        |
| r   | 17.9  | 6.7   | 7.2   | -                                        |

Symbols A, B and C represent factors of incubation temperature, period and amount of inoculum. Symbols 1, 2, 3 and 4 represent different levels of incubation temperature, period and amount of inoculum.

**Figure S1.** Degradation of aflatoxin B<sub>1</sub> by ND-1 in plate assay.

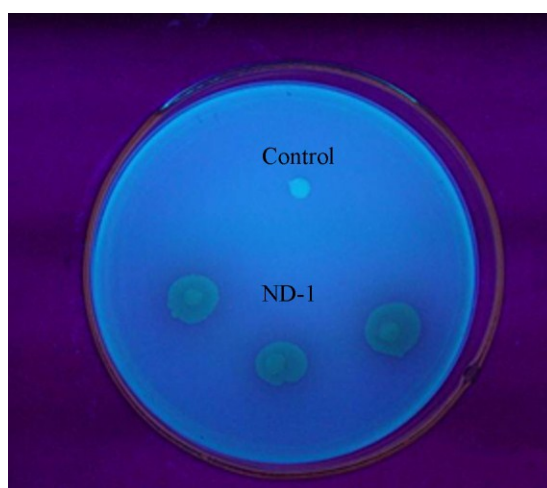

**Figure S2.** Degradation of aflatoxin B<sub>1</sub> by ND-2 in plate assay.

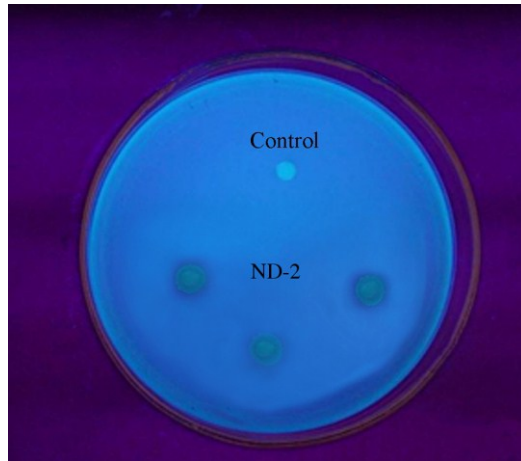

Supplement: Supplementary File 1 [file toxins-06-03157-s001.pdf]
